# Supplementary material
Source: PubMed Central journal article supplement (PMC10992114)
Supplement: 262_2021_3066_MOESM1_ESM.pdf [file 262_2021_3066_MOESM1_ESM.pdf]

## **Supplementary materials**

**Cancer Immunology, Immunotherapy (submitted in 2021) – Bolun Zhou et al.**

**Supplemental Figure 1** The Kaplan-Meier curves of the key genes selected for our prognostic model in the TCGA training cohort (a) and the GEPIA database (b).

**Supplemental Table 1** Results of the univariate Cox regression analysis.
