# Supplementary material
Source: PubMed Central journal article supplement (PMC10992114)
Supplement: 262_2021_3066_MOESM3_ESM.pdf [file 262_2021_3066_MOESM3_ESM.pdf]

| characteristi | Hazard.Ratic | CI95         | P.Value |
|---------------|--------------|--------------|---------|
| 1 BIRC5       | 1.2689       | 1.1313-1.426 | 0       |
| 2 HDGF        | 1.3312       | 1.052-1.684  | 0.017   |
| 3 ROBO2       | 0.8042       | 0.6551-0.987 | 0.037   |
| 4 CD1C        | 0.8369       | 0.7528-0.930 | 0.001   |
| 5 STING1      | 0.8703       | 0.7484-1.011 | 0.071   |
| 6 CD1E        | 0.8171       | 0.7256-0.920 | 0.001   |
| 7 RAC3        | 1.0487       | 0.9245-1.189 | 0.46    |
| 8 TLR3        | 1.1083       | 0.9417-1.304 | 0.216   |
| 9 CD1A        | 0.9119       | 0.839-0.991  | 0.03    |
| 10 EED        | 1.1673       | 0.8464-1.609 | 0.346   |
| 11 SPINK5     | 0.9915       | 0.9159-1.071 | 0.834   |
| 12 ADRB2      | 0.8065       | 0.6932-0.938 | 0.005   |
| 13 CYSLTR1    | 0.8786       | 0.7468-1.031 | 0.119   |
| 14 GZMB       | 1.0136       | 0.9123-1.126 | 0.801   |
| 15 DMBT1      | 0.9404       | 0.8862-0.997 | 0.042   |
| 16 CXCL10     | 1.0167       | 0.9324-1.108 | 0.707   |
| 17 PSMD14     | 1.5639       | 1.2036-2.032 | 0.001   |
| 18 CX3CR1     | 0.7978       | 0.6944-0.916 | 0.001   |
| 19 CACYBP     | 1.5176       | 1.1844-1.944 | 0.001   |
| 20 SCTR       | 0.9345       | 0.8623-1.012 | 0.099   |
| 21 TNFSF13    | 0.829        | 0.6929-0.991 | 0.04    |
| 22 CD81       | 0.8615       | 0.6989-1.061 | 0.162   |
| 23 CXCL17     | 0.8676       | 0.8108-0.928 | 0       |
| 24 PDK1       | 1.0243       | 0.8295-1.264 | 0.824   |
| 25 CD1B       | 0.7884       | 0.6778-0.917 | 0.002   |
| 26 AR         | 0.9557       | 0.8146-1.121 | 0.579   |
| 27 NRAS       | 1.4223       | 1.1445-1.767 | 0.001   |
| 28 DUOX1      | 0.9359       | 0.8454-1.036 | 0.202   |
| 29 CXCL9      | 0.9769       | 0.9015-1.058 | 0.568   |
| 30 TK2        | 0.8271       | 0.6606-1.031 | 0.098   |
| 31 SCGB3A1    | 0.9277       | 0.885-0.972  | 0.002   |
| 32 TRIM22     | 0.8675       | 0.7494-1.004 | 0.057   |
| 33 ELN        | 0.9072       | 0.8238-0.999 | 0.048   |
| 34 WFDC2      | 0.8744       | 0.7992-0.956 | 0.003   |
| 35 PSMD4      | 1.3947       | 1.0531-1.847 | 0.02    |
| 36 AGRP       | 0.8651       | 0.7199-1.039 | 0.122   |
| 37 FAM3D      | 0.968        | 0.8852-1.058 | 0.476   |
| 38 S100B      | 0.9047       | 0.8224-0.991 | 0.039   |
| 39 THRB       | 1.1887       | 0.9959-1.418 | 0.056   |
| 40 PGC        | 0.9578       | 0.9204-0.996 | 0.033   |
| 41 SFTPA2     | 0.9553       | 0.9144-0.998 | 0.04    |
| 42 IL33       | 0.8844       | 0.7887-0.991 | 0.036   |
| 43 NR3C2      | 0.8134       | 0.7074-0.931 | 0.004   |
| 44 PLXNA2     | 0.8899       | 0.7801-1.011 | 0.083   |
| 45 DUOX2      | 1.0614       | 0.9501-1.189 | 0.292   |

|    |         |        |              |       |
|----|---------|--------|--------------|-------|
| 46 | PSMD2   | 1.5521 | 1.2438-1.936 | 0     |
| 47 | GREM1   | 1.1094 | 1.0117-1.216 | 0.027 |
| 48 | FCGRT   | 0.7444 | 0.6118-0.909 | 0.003 |
| 49 | RETN    | 0.9347 | 0.8531-1.024 | 0.148 |
| 50 | VIPR1   | 0.8008 | 0.6954-0.922 | 0.002 |
| 51 | IFNG    | 0.984  | 0.8509-1.137 | 0.828 |
| 52 | SFTPA1  | 0.9582 | 0.9187-0.999 | 0.047 |
| 53 | GDF10   | 0.8423 | 0.7372-0.962 | 0.012 |
| 54 | PSMD11  | 1.6517 | 1.2936-2.108 | 0     |
| 55 | COLEC12 | 0.9285 | 0.8289-1.04  | 0.2   |
| 56 | CCL8    | 1.0101 | 0.9078-1.122 | 0.854 |
| 57 | PSMC4   | 1.5943 | 1.2333-2.060 | 0     |
| 58 | F2RL1   | 1.2275 | 1.0856-1.387 | 0.001 |
| 59 | SYTL1   | 0.8392 | 0.7204-0.977 | 0.024 |
| 60 | GPI     | 1.5888 | 1.2834-1.966 | 0     |
| 61 | ACKR1   | 0.9087 | 0.8283-0.990 | 0.043 |
| 62 | PSMD3   | 1.2506 | 0.993-1.5749 | 0.057 |
| 63 | SLPI    | 0.9854 | 0.9184-1.057 | 0.681 |
| 64 | CTSG    | 0.8425 | 0.7325-0.968 | 0.016 |
| 65 | HLA.DMA | 0.8024 | 0.7065-0.912 | 0.001 |
| 66 | STAT1   | 1.1564 | 0.994-1.3452 | 0.06  |
| 67 | CTSE    | 0.9732 | 0.9214-1.027 | 0.329 |
| 68 | TUBB3   | 1.1566 | 1.0197-1.312 | 0.024 |
| 69 | ISG20L2 | 1.3538 | 1.007-1.8202 | 0.045 |
| 70 | FGFR2   | 0.8969 | 0.7914-1.016 | 0.088 |
| 71 | SHC3    | 0.8191 | 0.6934-0.967 | 0.019 |
| 72 | CCL26   | 1.0579 | 0.9147-1.222 | 0.448 |
| 73 | RXRG    | 0.8586 | 0.7173-1.027 | 0.097 |
| 74 | TFR2    | 1.0267 | 0.8349-1.262 | 0.803 |
| 75 | PPP4C   | 1.3332 | 1.0004-1.776 | 0.05  |
| 76 | TGFBR3  | 0.9962 | 0.8567-1.158 | 0.961 |
| 77 | CXCL11  | 1.0445 | 0.9523-1.149 | 0.355 |
| 78 | SEM1    | 1.2429 | 0.9645-1.602 | 0.093 |
| 79 | CD40LG  | 0.7537 | 0.635-0.8948 | 0.001 |
| 80 | SFTPD   | 0.9031 | 0.8509-0.958 | 0.001 |
| 81 | CD74    | 0.8687 | 0.7764-0.972 | 0.014 |
| 82 | NFYA    | 1.144  | 0.927-1.4118 | 0.21  |
| 83 | CCL17   | 0.9084 | 0.8298-0.992 | 0.038 |
| 84 | CCL14   | 0.7648 | 0.6158-0.949 | 0.015 |
| 85 | LEFTY2  | 0.8777 | 0.7257-1.062 | 0.179 |
| 86 | TLR2    | 0.8566 | 0.7592-0.966 | 0.012 |
| 87 | VEGFD   | 0.8401 | 0.7552-0.932 | 0.001 |
| 88 | GDF15   | 0.917  | 0.836-1.0059 | 0.066 |
| 89 | HSPA1B  | 1.1666 | 0.9775-1.392 | 0.088 |
| 90 | ARTN    | 1.0558 | 0.9268-1.202 | 0.414 |
| 91 | MR1     | 0.8172 | 0.6693-0.997 | 0.048 |

|     |           |        |              |       |
|-----|-----------|--------|--------------|-------|
| 92  | HLA.DRB1  | 0.8729 | 0.7856-0.969 | 0.011 |
| 93  | CAT       | 0.793  | 0.6645-0.946 | 0.01  |
| 94  | TNFRSF10C | 0.8724 | 0.7519-1.012 | 0.072 |
| 95  | EDNRB     | 0.9734 | 0.8505-1.114 | 0.695 |
| 96  | HLA.DRB5  | 0.8789 | 0.8055-0.959 | 0.004 |
| 97  | CCL4      | 0.9592 | 0.843-1.0914 | 0.527 |
| 98  | PTGFR     | 0.9764 | 0.841-1.1339 | 0.753 |
| 99  | TGFBR2    | 0.9063 | 0.7791-1.054 | 0.202 |
| 100 | RNASEL    | 1.0965 | 0.8606-1.397 | 0.456 |
| 101 | RORA      | 0.8203 | 0.6597-1.019 | 0.075 |
| 102 | NOD1      | 0.7804 | 0.6445-0.949 | 0.011 |
| 103 | NPR1      | 1.0424 | 0.9092-1.199 | 0.552 |
| 104 | AGER      | 0.902  | 0.8388-0.97  | 0.005 |
| 105 | IL36RN    | 1.0338 | 0.9307-1.148 | 0.535 |
| 106 | TNFSF15   | 0.93   | 0.8128-1.064 | 0.291 |
| 107 | ZC3HAV1L  | 1.1335 | 0.9514-1.350 | 0.161 |
| 108 | IL7       | 1.1383 | 0.9522-1.360 | 0.155 |
| 109 | PAK2      | 1.4319 | 1.1106-1.846 | 0.006 |
| 110 | FOS       | 0.9494 | 0.8562-1.052 | 0.324 |
| 111 | ERAP1     | 1.0568 | 0.8777-1.272 | 0.56  |
| 112 | IGHG1     | 0.9303 | 0.8658-0.999 | 0.049 |
| 113 | OGN       | 0.8512 | 0.753-0.9622 | 0.01  |
| 114 | IL6ST     | 0.8588 | 0.7188-1.026 | 0.094 |
| 115 | TRIM5     | 1.0768 | 0.8432-1.379 | 0.553 |
| 116 | HLA.DPB1  | 0.859  | 0.769-0.9599 | 0.007 |
| 117 | TNFSF12   | 0.8268 | 0.6753-1.012 | 0.066 |
| 118 | CCRL2     | 0.9319 | 0.7939-1.094 | 0.389 |
| 119 | PIK3R1    | 0.8486 | 0.6954-1.039 | 0.106 |
| 120 | SDC2      | 1.0678 | 0.9303-1.229 | 0.351 |
| 121 | NRTN      | 0.986  | 0.8422-1.154 | 0.861 |
| 122 | FGFR3     | 0.992  | 0.9111-1.080 | 0.854 |
| 123 | CD22      | 0.8397 | 0.7286-0.967 | 0.016 |
| 124 | PPP3R1    | 1.3798 | 1.0079-1.888 | 0.045 |
| 125 | LTBP2     | 0.9479 | 0.8417-1.067 | 0.378 |
| 126 | CCR10     | 0.9317 | 0.778-1.1158 | 0.442 |
| 127 | FGF12     | 1.2562 | 1.1073-1.429 | 0     |
| 128 | IL31RA    | 0.9872 | 0.8718-1.117 | 0.839 |
| 129 | CMTM7     | 0.7822 | 0.6514-0.939 | 0.009 |
| 130 | CX3CL1    | 0.8905 | 0.8118-0.976 | 0.014 |
| 131 | BLNK      | 0.8509 | 0.7001-1.034 | 0.105 |
| 132 | APOD      | 1.0041 | 0.9296-1.084 | 0.916 |
| 133 | CD8A      | 0.9396 | 0.8322-1.067 | 0.315 |
| 134 | LGMN      | 0.972  | 0.7866-1.207 | 0.793 |
| 135 | PTN       | 0.9574 | 0.8668-1.057 | 0.391 |
| 136 | DHX58     | 1.0375 | 0.8672-1.247 | 0.687 |
| 137 | VGF       | 1.1081 | 1.0014-1.226 | 0.047 |

|     |          |        |              |       |
|-----|----------|--------|--------------|-------|
| 138 | LTB      | 0.8831 | 0.7873-0.990 | 0.034 |
| 139 | TEK      | 0.8705 | 0.7405-1.020 | 0.093 |
| 140 | A2M      | 0.8899 | 0.7885-1.000 | 0.059 |
| 141 | BMP2     | 1.0261 | 0.9187-1.140 | 0.648 |
| 142 | PRDX1    | 1.14   | 0.9405-1.380 | 0.182 |
| 143 | ENG      | 0.9253 | 0.7774-1.100 | 0.382 |
| 144 | BMP3     | 0.916  | 0.8397-0.990 | 0.048 |
| 145 | CRLF3    | 0.9599 | 0.7163-1.280 | 0.784 |
| 146 | ULBP1    | 1.0115 | 0.8385-1.220 | 0.905 |
| 147 | DCK      | 1.2301 | 1.003-1.508  | 0.047 |
| 148 | CHP1     | 1.1223 | 0.9311-1.350 | 0.226 |
| 149 | TPT1     | 0.9857 | 0.8026-1.210 | 0.891 |
| 150 | PSMC2    | 1.1986 | 0.8848-1.620 | 0.242 |
| 151 | HLA.DPA1 | 0.8826 | 0.7952-0.970 | 0.019 |
| 152 | CDK4     | 1.0729 | 0.8982-1.280 | 0.438 |
| 153 | TAFA5    | 0.9708 | 0.8516-1.100 | 0.657 |
| 154 | PAK3     | 0.9191 | 0.7969-1.060 | 0.246 |
| 155 | SEMA5B   | 1.0866 | 0.9022-1.300 | 0.382 |
| 156 | CSRP1    | 1.0472 | 0.8006-1.360 | 0.737 |
| 157 | CCL7     | 1.1102 | 0.9866-1.240 | 0.082 |
| 158 | PTK2B    | 0.8642 | 0.7139-1.040 | 0.134 |
| 159 | CD8B     | 0.9137 | 0.7993-1.040 | 0.186 |
| 160 | STC2     | 1.2147 | 1.0823-1.360 | 0.001 |
| 161 | PTH1R    | 0.8461 | 0.7022-1.010 | 0.079 |
| 162 | FABP4    | 0.9722 | 0.8824-1.070 | 0.568 |
| 163 | SECTM1   | 1.0963 | 0.9542-1.250 | 0.194 |
| 164 | GIPR     | 0.9229 | 0.7922-1.070 | 0.302 |
| 165 | CCL22    | 0.9447 | 0.8447-1.050 | 0.319 |
| 166 | ICAM2    | 0.9054 | 0.7404-1.100 | 0.332 |
| 167 | SLC40A1  | 0.9308 | 0.8191-1.050 | 0.271 |
| 168 | APOBEC3H | 0.8282 | 0.6976-0.980 | 0.031 |
| 169 | SEMA6C   | 0.9034 | 0.7667-1.060 | 0.224 |
| 170 | HLA.DOA  | 0.868  | 0.781-0.964  | 0.009 |
| 171 | PLXNB2   | 1.0882 | 0.9072-1.300 | 0.363 |
| 172 | BMP8B    | 1.071  | 0.89-1.2889  | 0.468 |
| 173 | SEMA6D   | 0.845  | 0.7009-1.010 | 0.077 |
| 174 | SLIT2    | 0.9562 | 0.8262-1.100 | 0.548 |
| 175 | ELAVL1   | 1.5015 | 1.0254-2.190 | 0.037 |
| 176 | APOM     | 0.9389 | 0.7661-1.150 | 0.544 |
| 177 | CIITA    | 0.8133 | 0.7095-0.930 | 0.003 |
| 178 | DES      | 0.9165 | 0.8312-1.010 | 0.081 |
| 179 | GPBR1    | 0.9802 | 0.8206-1.170 | 0.826 |
| 180 | C3       | 0.9973 | 0.9059-1.090 | 0.955 |
| 181 | NDP      | 1.0188 | 0.9095-1.140 | 0.747 |
| 182 | NR0B2    | 0.8949 | 0.8191-0.970 | 0.014 |
| 183 | SERPIND1 | 0.8945 | 0.8233-0.970 | 0.008 |

|     |           |        |              |       |
|-----|-----------|--------|--------------|-------|
| 184 | FGF1      | 0.897  | 0.7572-1.062 | 0.209 |
| 185 | IL17RD    | 1.0662 | 0.8951-1.27  | 0.473 |
| 186 | NOX1      | 1.166  | 0.942-1.443  | 0.158 |
| 187 | LMBR1     | 1.3355 | 1.0143-1.758 | 0.039 |
| 188 | CCL11     | 1.0093 | 0.9026-1.128 | 0.871 |
| 189 | TNFRSF10D | 1.1315 | 0.9544-1.34  | 0.155 |
| 190 | NFATC1    | 0.8251 | 0.6711-1.014 | 0.068 |
| 191 | MMP12     | 1.055  | 0.9836-1.13  | 0.134 |
| 192 | RASGRP1   | 0.9349 | 0.7967-1.09  | 0.41  |
| 193 | LGR6      | 0.9666 | 0.8544-1.09  | 0.589 |
| 194 | ACVR2B    | 0.917  | 0.7178-1.17  | 0.488 |
| 195 | NCK1      | 1.2203 | 0.9634-1.54  | 0.099 |
| 196 | PSME2     | 1.3128 | 1.0295-1.67  | 0.028 |
| 197 | RBP2      | 0.9072 | 0.7481-1.10  | 0.322 |
| 198 | IL34      | 0.8638 | 0.728-1.024  | 0.093 |
| 199 | SKIV2L    | 1.0328 | 0.8015-1.33  | 0.803 |
| 200 | TAP2      | 1.2657 | 1.0594-1.51  | 0.009 |
| 201 | NAMPT     | 1.1128 | 0.9765-1.26  | 0.109 |
| 202 | MICB      | 1.0648 | 0.9152-1.23  | 0.416 |
| 203 | KRAS      | 1.3577 | 1.1258-1.63  | 0.001 |
| 204 | IL5RA     | 0.7601 | 0.5941-0.97  | 0.029 |
| 205 | TMSB10    | 1.3827 | 1.1317-1.68  | 0.002 |
| 206 | PSMC3     | 1.6502 | 1.1742-2.31  | 0.004 |
| 207 | GAL       | 1.1307 | 1.0409-1.22  | 0.004 |
| 208 | CTSL      | 1.4266 | 1.23-1.6546  | 0     |
| 209 | CSF2      | 0.9159 | 0.8152-1.02  | 0.14  |
| 210 | NR2F1     | 0.9374 | 0.8143-1.07  | 0.368 |
| 211 | GREM2     | 1.0089 | 0.9015-1.12  | 0.877 |
| 212 | CCL23     | 0.9034 | 0.7892-1.03  | 0.14  |
| 213 | FGF18     | 0.8836 | 0.7691-1.01  | 0.081 |
| 214 | XCL1      | 0.9379 | 0.7942-1.10  | 0.449 |
| 215 | ADAR      | 1.273  | 1.0011-1.61  | 0.049 |
| 216 | TMSB4X    | 0.8756 | 0.7212-1.06  | 0.179 |
| 217 | PDCD1     | 0.9774 | 0.8488-1.12  | 0.751 |
| 218 | PSMD8     | 1.4455 | 1.1175-1.86  | 0.005 |
| 219 | PI15      | 1.1662 | 1.0253-1.32  | 0.019 |
| 220 | LTBP4     | 1.0219 | 0.8826-1.18  | 0.772 |
| 221 | HSPA1A    | 1.1729 | 1.0011-1.37  | 0.048 |
| 222 | CBL       | 1.0332 | 0.8367-1.27  | 0.761 |
| 223 | AVPR1A    | 1.0005 | 0.8522-1.17  | 0.995 |
| 224 | C5        | 1.0306 | 0.9343-1.13  | 0.547 |
| 225 | GHR       | 0.7602 | 0.5711-1.01  | 0.06  |
| 226 | TNFRSF10A | 1.1608 | 0.9645-1.39  | 0.115 |
| 227 | PLXNB1    | 0.8889 | 0.7594-1.04  | 0.142 |
| 228 | BTC       | 0.9236 | 0.81-1.0532  | 0.236 |
| 229 | IL1R1     | 0.9441 | 0.8057-1.10  | 0.477 |

|     |           |        |              |       |
|-----|-----------|--------|--------------|-------|
| 230 | CCL4L2    | 0.9287 | 0.8182-1.054 | 0.252 |
| 231 | TAP1      | 1.1622 | 1.012-1.3347 | 0.033 |
| 232 | TNFSF10   | 1.0158 | 0.8993-1.147 | 0.801 |
| 233 | DAXX      | 1.2007 | 0.8713-1.654 | 0.264 |
| 234 | NPR3      | 1.0422 | 0.9084-1.194 | 0.555 |
| 235 | TNFRSF13B | 0.7445 | 0.6023-0.920 | 0.006 |
| 236 | TNFSF14   | 1.1039 | 0.9162-1.33  | 0.299 |
| 237 | HSPA6     | 1.1072 | 0.9883-1.240 | 0.079 |
| 238 | TNFRSF10B | 1.1324 | 0.9199-1.393 | 0.241 |
| 239 | IL11      | 1.2796 | 1.1046-1.482 | 0.001 |
| 240 | GSK3B     | 1.2601 | 0.9744-1.624 | 0.078 |
| 241 | HLA.DRA   | 0.8662 | 0.7791-0.963 | 0.008 |
| 242 | RARA      | 0.9301 | 0.7459-1.154 | 0.52  |
| 243 | TNFRSF14  | 0.8695 | 0.7303-1.034 | 0.116 |
| 244 | IGHA2     | 0.9339 | 0.8608-1.013 | 0.1   |
| 245 | NEO1      | 1.0459 | 0.9098-1.202 | 0.528 |
| 246 | RABEP2    | 1.0101 | 0.7927-1.287 | 0.935 |
| 247 | PPIA      | 1.8147 | 1.3603-2.422 | 0     |
| 248 | IL13RA2   | 0.9844 | 0.8687-1.114 | 0.806 |
| 249 | KL        | 0.8056 | 0.6614-0.982 | 0.032 |
| 250 | PDGFA     | 1.0205 | 0.8804-1.182 | 0.788 |
| 251 | HLA.DQB1  | 0.8815 | 0.8021-0.964 | 0.009 |
| 252 | PSME3     | 1.4679 | 1.1276-1.910 | 0.004 |
| 253 | MARCO     | 0.9626 | 0.893-1.037  | 0.32  |
| 254 | CARD11    | 1.0809 | 0.955-1.2234 | 0.218 |
| 255 | ADRM1     | 1.3214 | 1.009-1.7304 | 0.043 |
| 256 | CSF3R     | 0.949  | 0.8497-1.054 | 0.353 |
| 257 | PIK3CA    | 1.255  | 0.9709-1.622 | 0.083 |
| 258 | ADM       | 1.2676 | 1.1401-1.404 | 0     |
| 259 | HSP90AB1  | 1.0883 | 0.8713-1.354 | 0.456 |
| 260 | ARAF      | 1.05   | 0.8006-1.377 | 0.724 |
| 261 | TFRC      | 1.1234 | 0.989-1.276  | 0.073 |
| 262 | PTPN11    | 1.2392 | 0.9883-1.553 | 0.063 |
| 263 | CXCL14    | 0.9741 | 0.9211-1.030 | 0.36  |
| 264 | HLA.DOB   | 0.806  | 0.7061-0.92  | 0.001 |
| 265 | TNFRSF25  | 0.9543 | 0.8367-1.084 | 0.486 |
| 266 | LEPR      | 0.9973 | 0.8635-1.152 | 0.97  |
| 267 | CCL5      | 0.9686 | 0.8624-1.087 | 0.59  |
| 268 | MUC5AC    | 1.0588 | 1.0028-1.114 | 0.039 |
| 269 | ACKR4     | 0.9455 | 0.7606-1.174 | 0.614 |
| 270 | CR2       | 0.8428 | 0.7559-0.934 | 0.002 |
| 271 | CRIM1     | 1.1673 | 1.0025-1.354 | 0.046 |
| 272 | PAK4      | 1.4047 | 1.1275-1.750 | 0.002 |
| 273 | PPP3CC    | 0.8537 | 0.6246-1.160 | 0.321 |
| 274 | IL6       | 1.014  | 0.9206-1.116 | 0.778 |
| 275 | LTF       | 0.9606 | 0.9009-1.024 | 0.22  |

|              |        |              |       |
|--------------|--------|--------------|-------|
| 276 NR6A1    | 0.9203 | 0.7572-1.118 | 0.404 |
| 277 TXK      | 0.9996 | 0.7722-1.290 | 0.997 |
| 278 MAPK8    | 1.1436 | 0.843-1.5514 | 0.389 |
| 279 ACO1     | 0.9838 | 0.8133-1.190 | 0.867 |
| 280 ANGPT1   | 0.8881 | 0.766-1.0297 | 0.116 |
| 281 VIM      | 1.0682 | 0.906-1.2595 | 0.432 |
| 282 NR3C1    | 1.1213 | 0.9098-1.380 | 0.283 |
| 283 DDX17    | 0.9099 | 0.7093-1.167 | 0.458 |
| 284 NGFR     | 0.9662 | 0.8216-1.130 | 0.678 |
| 285 NDRG1    | 1.1555 | 1.0091-1.320 | 0.036 |
| 286 NFKB1    | 1.1394 | 0.8986-1.440 | 0.281 |
| 287 VEGFA    | 1.1109 | 0.9691-1.270 | 0.131 |
| 288 VDR      | 0.9274 | 0.7918-1.080 | 0.35  |
| 289 SEMA5A   | 1.0418 | 0.9014-1.200 | 0.579 |
| 290 APOBEC3A | 0.9925 | 0.8458-1.160 | 0.926 |
| 291 CHUK     | 1.2635 | 0.9623-1.650 | 0.092 |
| 292 AZGP1    | 0.9783 | 0.9259-1.030 | 0.436 |
| 293 CALCRL   | 0.9429 | 0.8127-1.090 | 0.439 |
| 294 SSTR1    | 0.9536 | 0.8297-1.090 | 0.503 |
| 295 HBEGF    | 1.0847 | 0.953-1.2340 | 0.218 |
| 296 BRAF     | 0.9025 | 0.698-1.167  | 0.434 |
| 297 IL16     | 0.7477 | 0.6268-0.890 | 0.001 |
| 298 RAC2     | 1.0008 | 0.8598-1.160 | 0.992 |
| 299 TIE1     | 1.0135 | 0.85-1.2085  | 0.881 |
| 300 TNFRSF19 | 0.9042 | 0.801-1.0208 | 0.104 |
| 301 ANOS1    | 0.8529 | 0.7582-0.950 | 0.008 |
| 302 SOS1     | 1.1087 | 0.8691-1.410 | 0.406 |
| 303 UCN3     | 0.9813 | 0.9039-1.060 | 0.654 |
| 304 BMP7     | 1.1285 | 1.0183-1.250 | 0.021 |
| 305 EDNRA    | 1.0338 | 0.8935-1.190 | 0.655 |
| 306 TRDV1    | 0.8338 | 0.7033-0.980 | 0.036 |
| 307 RBP5     | 0.8378 | 0.6992-1.000 | 0.055 |
| 308 CXCL16   | 0.9079 | 0.7606-1.080 | 0.285 |
| 309 CST4     | 1.0015 | 0.9048-1.100 | 0.977 |
| 310 ZC3HAV1  | 1.1859 | 0.8934-1.570 | 0.238 |
| 311 MICA     | 1.0108 | 0.8296-1.230 | 0.915 |
| 312 MDK      | 1.0473 | 0.9308-1.170 | 0.442 |
| 313 FAM3C    | 1.0392 | 0.8955-1.200 | 0.613 |
| 314 IGHV1.24 | 0.9314 | 0.8724-0.990 | 0.033 |
| 315 HLA.E    | 0.9289 | 0.7718-1.110 | 0.435 |
| 316 CD72     | 0.9417 | 0.789-1.124  | 0.506 |
| 317 FLT3LG   | 0.9435 | 0.7084-1.250 | 0.691 |
| 318 FGF9     | 0.8818 | 0.7487-1.030 | 0.132 |
| 319 TCF7L2   | 1.1559 | 0.9234-1.440 | 0.206 |
| 320 AHNAK    | 1.0847 | 0.9599-1.220 | 0.192 |
| 321 JAG2     | 1.0342 | 0.8901-1.200 | 0.66  |

|     |          |        |              |       |
|-----|----------|--------|--------------|-------|
| 322 | ISG15    | 1.115  | 1.0053-1.236 | 0.039 |
| 323 | RELA     | 1.652  | 1.1514-2.370 | 0.006 |
| 324 | APOH     | 0.9679 | 0.8963-1.049 | 0.406 |
| 325 | BPIFB1   | 0.9657 | 0.9184-1.019 | 0.172 |
| 326 | S1PR1    | 0.93   | 0.7939-1.089 | 0.369 |
| 327 | EIF2AK2  | 1.1773 | 0.9415-1.477 | 0.152 |
| 328 | SEMA3G   | 0.9295 | 0.7813-1.109 | 0.409 |
| 329 | SEMA4A   | 0.758  | 0.6342-0.906 | 0.002 |
| 330 | HLA.DQA1 | 0.8704 | 0.7877-0.963 | 0.006 |
| 331 | HLA.DMB  | 0.8437 | 0.7495-0.949 | 0.005 |
| 332 | ACTG1    | 1.5375 | 1.1794-2.007 | 0.001 |
| 333 | ERAP2    | 1.045  | 0.9498-1.149 | 0.366 |
| 334 | CCR7     | 0.8547 | 0.752-0.9716 | 0.016 |
| 335 | FCGR3A   | 1.0003 | 0.8912-1.127 | 0.996 |
| 336 | AKT2     | 1.3855 | 1.0564-1.817 | 0.018 |
| 337 | IKBKB    | 0.8414 | 0.6883-1.028 | 0.092 |
| 338 | PDGFC    | 1.1129 | 0.9418-1.319 | 0.209 |
| 339 | SEMA4C   | 1.0086 | 0.8283-1.228 | 0.932 |
| 340 | IL17C    | 1.072  | 0.9286-1.237 | 0.343 |
| 341 | PSMC5    | 1.869  | 1.2874-2.713 | 0.001 |
| 342 | FGF2     | 1.2141 | 0.9849-1.496 | 0.069 |
| 343 | APOBEC3C | 1.0486 | 0.8857-1.247 | 0.582 |
| 344 | PSMD1    | 1.4392 | 1.154-1.7949 | 0.001 |
| 345 | ADIPOR2  | 1.6097 | 1.2806-2.029 | 0     |
| 346 | CCL13    | 0.9194 | 0.842-1.0039 | 0.061 |
| 347 | PSMD7    | 1.5828 | 1.1931-2.099 | 0.001 |
| 348 | CYLD     | 0.8121 | 0.6391-1.032 | 0.089 |
| 349 | LTBR     | 1.4639 | 1.1706-1.836 | 0.001 |
| 350 | S100A12  | 1.1049 | 0.9766-1.256 | 0.113 |
| 351 | TRPC4AP  | 1.3267 | 0.9428-1.867 | 0.105 |
| 352 | UBR1     | 1.0611 | 0.846-1.3307 | 0.608 |
| 353 | NR0B1    | 1.0691 | 0.9959-1.147 | 0.065 |
| 354 | IGHA1    | 0.9258 | 0.8523-1.009 | 0.067 |
| 355 | THRA     | 0.8417 | 0.6847-1.034 | 0.102 |
| 356 | ANXA6    | 0.9507 | 0.7794-1.159 | 0.618 |
| 357 | RXFP1    | 0.7231 | 0.5255-0.999 | 0.047 |
| 358 | IGKV1.5  | 0.9297 | 0.8591-1.006 | 0.07  |
| 359 | PSMD5    | 1.0941 | 0.8106-1.476 | 0.557 |
| 360 | GMFG     | 0.8326 | 0.7068-0.986 | 0.028 |
| 361 | TRGJP2   | 1.0082 | 0.9031-1.129 | 0.885 |
| 362 | IL37     | 0.9669 | 0.9049-1.033 | 0.32  |
| 363 | CD4      | 0.8964 | 0.782-1.0276 | 0.117 |
| 364 | SEMA3A   | 1.133  | 1.0299-1.246 | 0.01  |
| 365 | CAMP     | 0.8711 | 0.746-1.017  | 0.081 |
| 366 | BRD8     | 0.9853 | 0.7557-1.284 | 0.913 |
| 367 | WNT5A    | 0.993  | 0.8657-1.139 | 0.92  |



|     |          |        |              |       |
|-----|----------|--------|--------------|-------|
| 368 | PML      | 1.2104 | 0.9819-1.492 | 0.074 |
| 369 | JUND     | 0.9666 | 0.7971-1.172 | 0.729 |
| 370 | CCR4     | 0.8252 | 0.7174-0.949 | 0.007 |
| 371 | S100A8   | 1.0275 | 0.948-1.1137 | 0.509 |
| 372 | CCL3L1   | 0.8759 | 0.7585-1.011 | 0.071 |
| 373 | IL17D    | 0.8551 | 0.6443-1.134 | 0.278 |
| 374 | CXCR2    | 0.9014 | 0.7275-1.116 | 0.343 |
| 375 | IL20RA   | 1.1169 | 0.9843-1.267 | 0.086 |
| 376 | BTK      | 0.8055 | 0.6946-0.934 | 0.004 |
| 377 | IL20RB   | 1.0902 | 1.0057-1.183 | 0.036 |
| 378 | FASLG    | 0.8789 | 0.7414-1.041 | 0.137 |
| 379 | S100A1   | 0.9216 | 0.787-1.0792 | 0.311 |
| 380 | SBDS     | 1.2024 | 0.93-1.5544  | 0.16  |
| 381 | PLXND1   | 0.8724 | 0.7465-1.019 | 0.086 |
| 382 | PSMD13   | 1.484  | 1.0767-2.049 | 0.016 |
| 383 | S100A7   | 1.0681 | 0.9844-1.159 | 0.114 |
| 384 | STC1     | 1.224  | 1.1016-1.36  | 0     |
| 385 | NFYB     | 1.4491 | 1.0305-2.037 | 0.033 |
| 386 | HSP90AA1 | 1.3972 | 1.107-1.7634 | 0.005 |
| 387 | ADRB1    | 0.8734 | 0.7687-0.992 | 0.038 |
| 388 | GNLY     | 0.9894 | 0.8868-1.103 | 0.849 |
| 389 | IL24     | 0.8104 | 0.676-0.9715 | 0.023 |
| 390 | S100A14  | 1.0158 | 0.9109-1.132 | 0.778 |
| 391 | UCN      | 1.0552 | 0.9123-1.220 | 0.469 |
| 392 | IL17RA   | 0.9071 | 0.7145-1.152 | 0.424 |
| 393 | IGHG3    | 0.9331 | 0.8621-1.01  | 0.086 |
| 394 | LTBP3    | 0.9455 | 0.8045-1.111 | 0.496 |
| 395 | TRAV41   | 0.8712 | 0.7227-1.050 | 0.148 |
| 396 | IGKV1.16 | 0.9239 | 0.8598-0.992 | 0.031 |
| 397 | BPHL     | 0.9556 | 0.763-1.1969 | 0.693 |
| 398 | IL22RA2  | 0.8602 | 0.7301-1.011 | 0.072 |
| 399 | GRB2     | 1.1203 | 0.8184-1.532 | 0.478 |
| 400 | ESM1     | 1.1149 | 0.992-1.253  | 0.068 |
| 401 | CNTFR    | 0.842  | 0.6521-1.087 | 0.187 |
| 402 | IL2RA    | 0.998  | 0.877-1.1357 | 0.976 |
| 403 | CXCL8    | 1.0908 | 0.9988-1.192 | 0.053 |
| 404 | IFNGR1   | 1.0008 | 0.8254-1.211 | 0.993 |
| 405 | IL6R     | 0.895  | 0.7702-1.04  | 0.147 |
| 406 | SDC1     | 0.9155 | 0.7784-1.076 | 0.286 |
| 407 | FAS      | 0.9565 | 0.8311-1.100 | 0.535 |
| 408 | ACVR2A   | 0.8747 | 0.6642-1.152 | 0.341 |
