# Supplementary material
Source: PubMed Central journal article supplement (PMC10992114)

**a**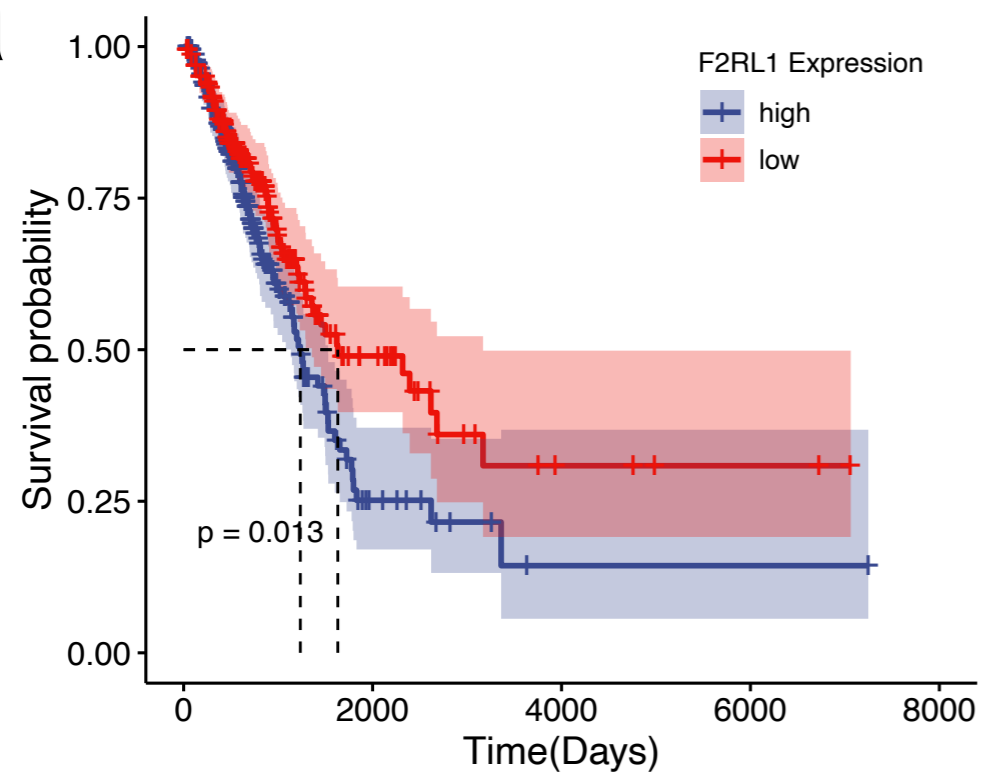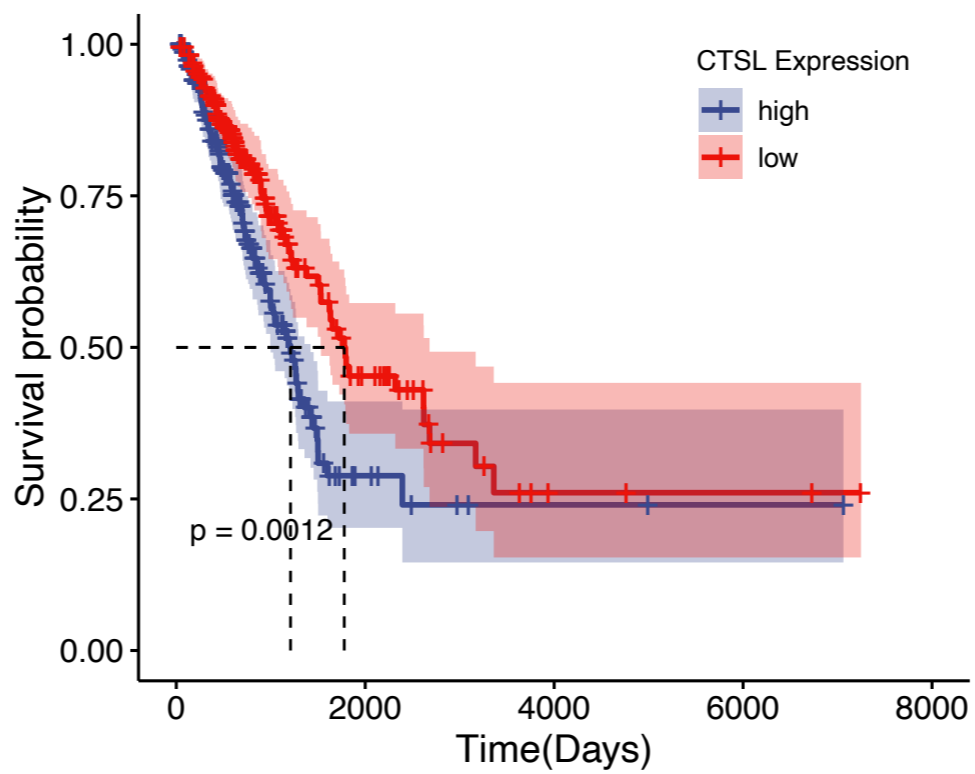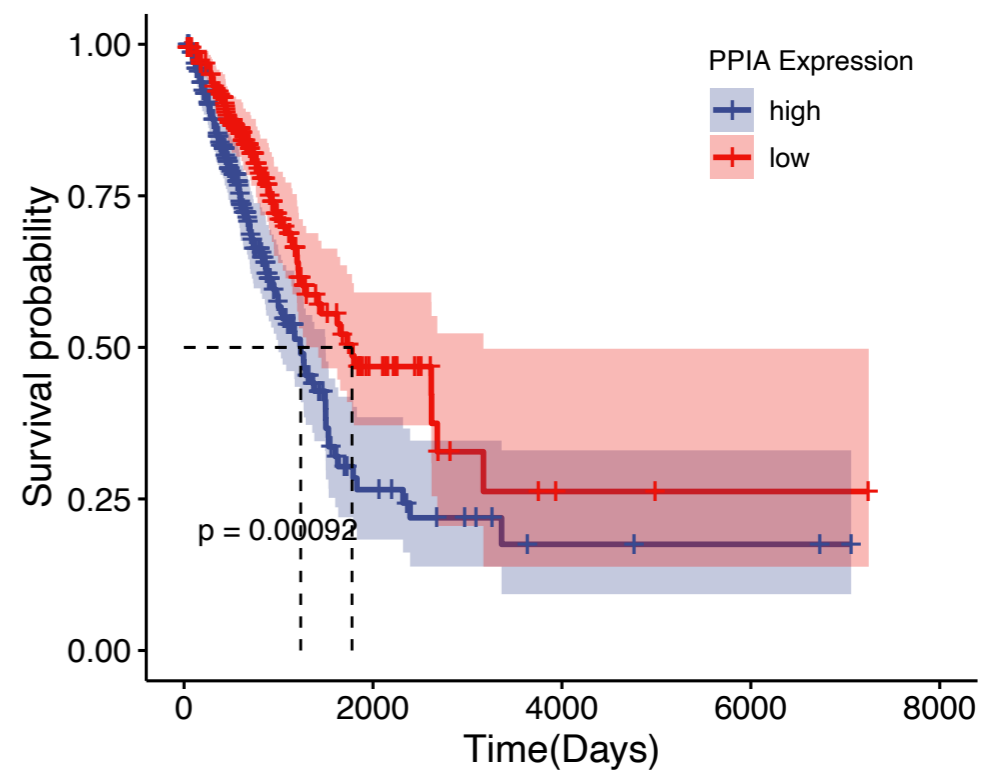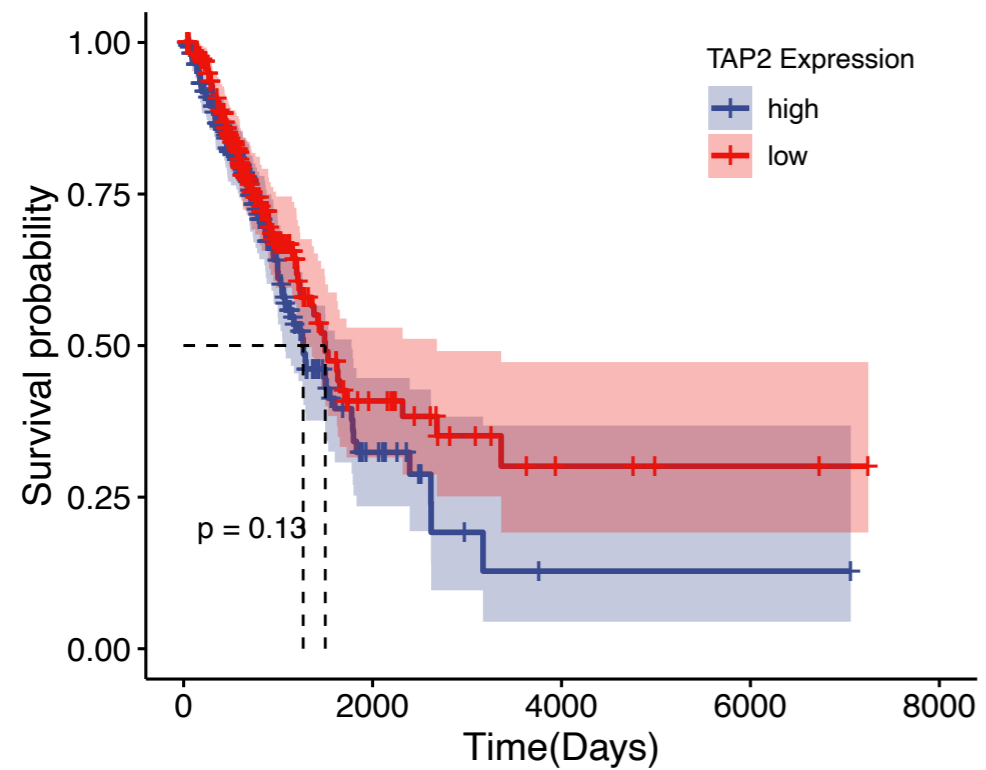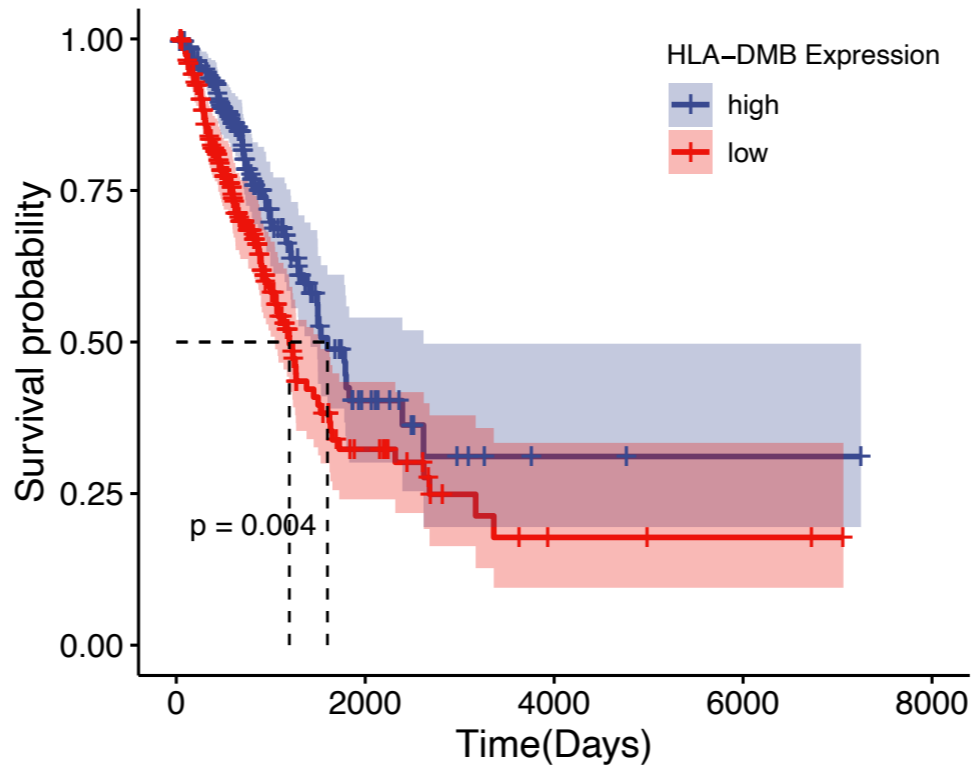**b**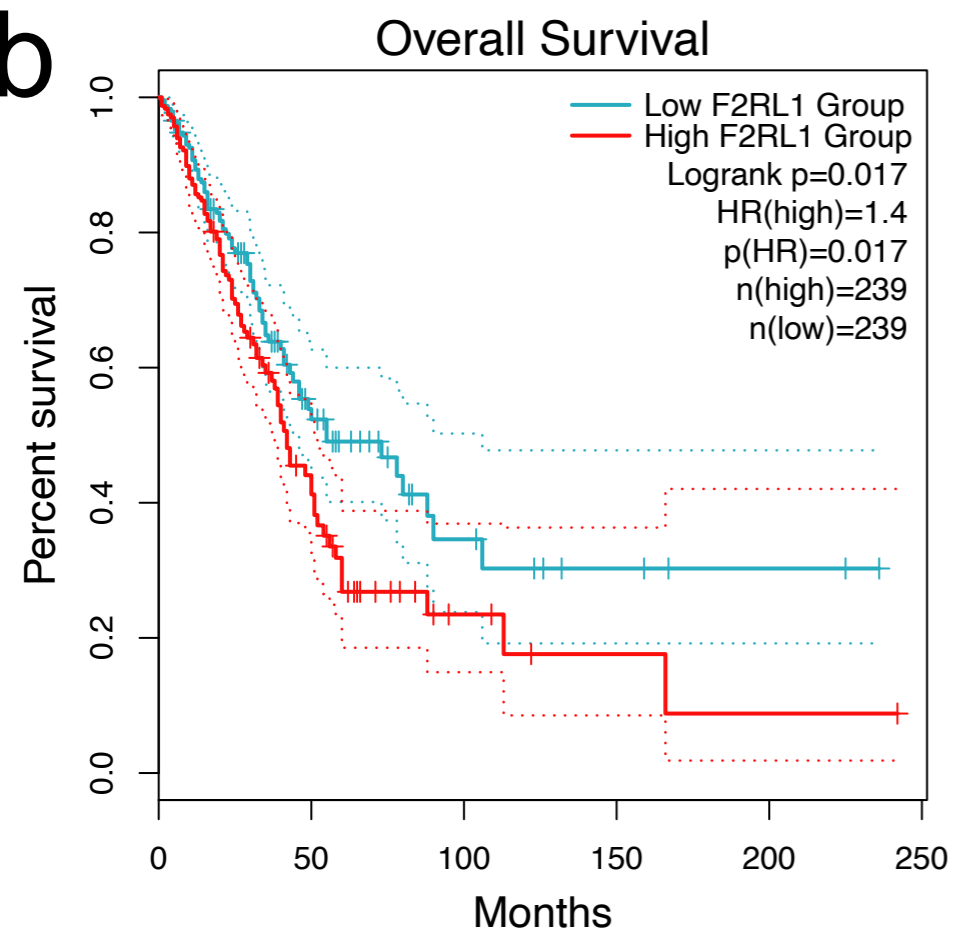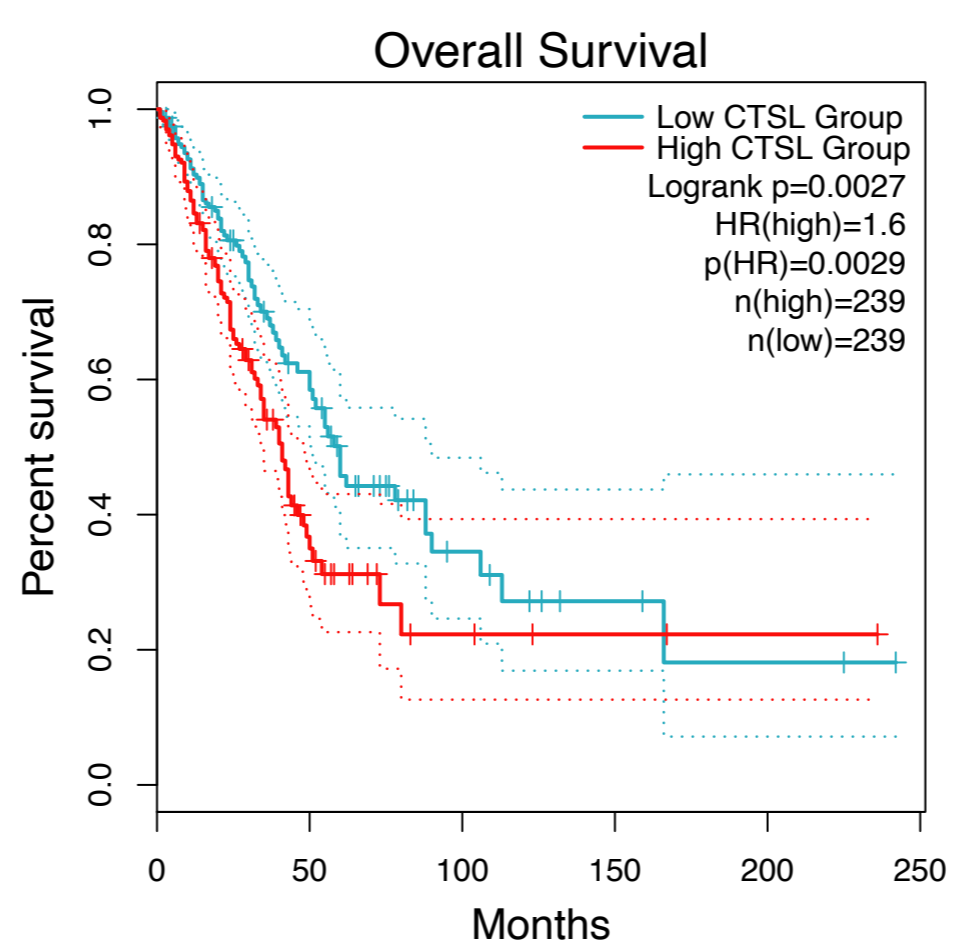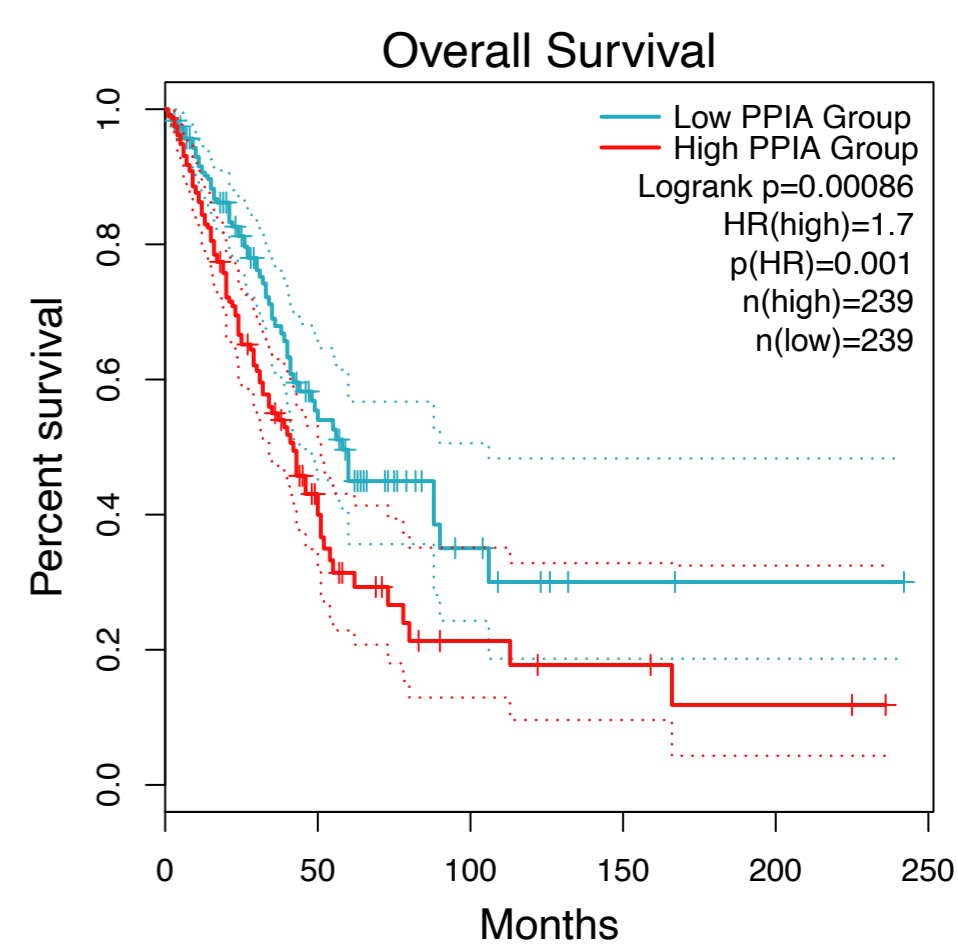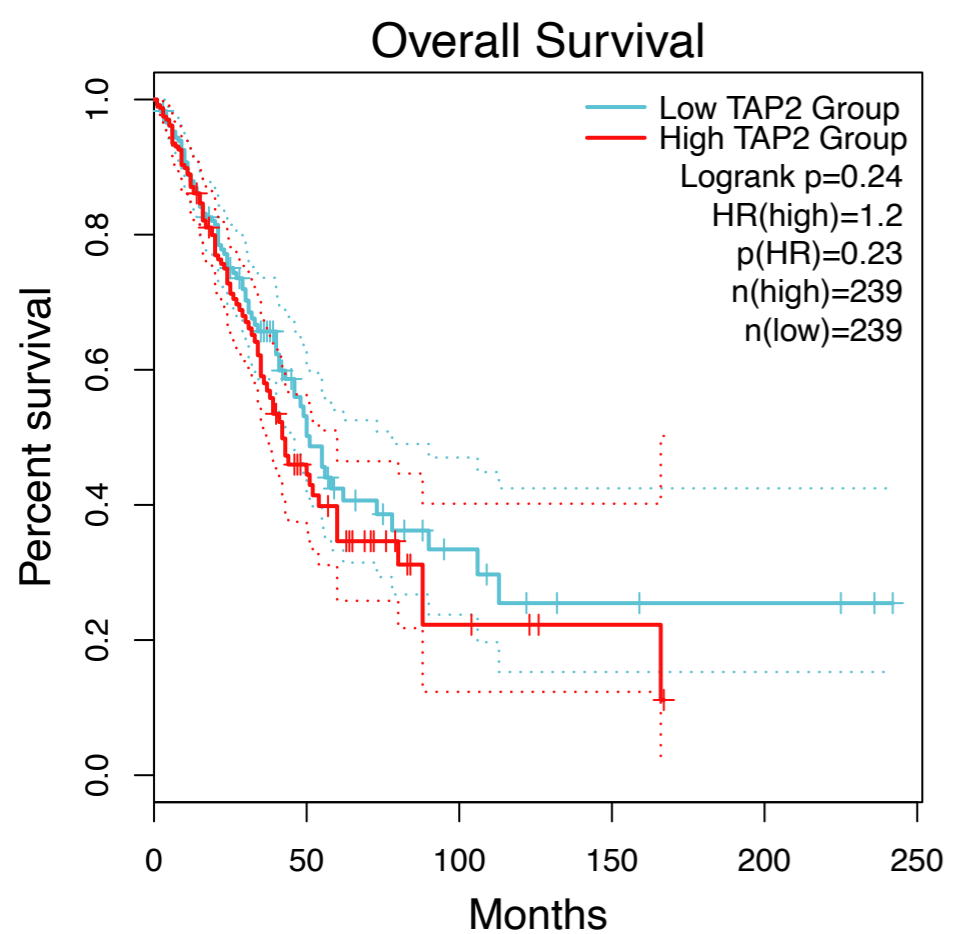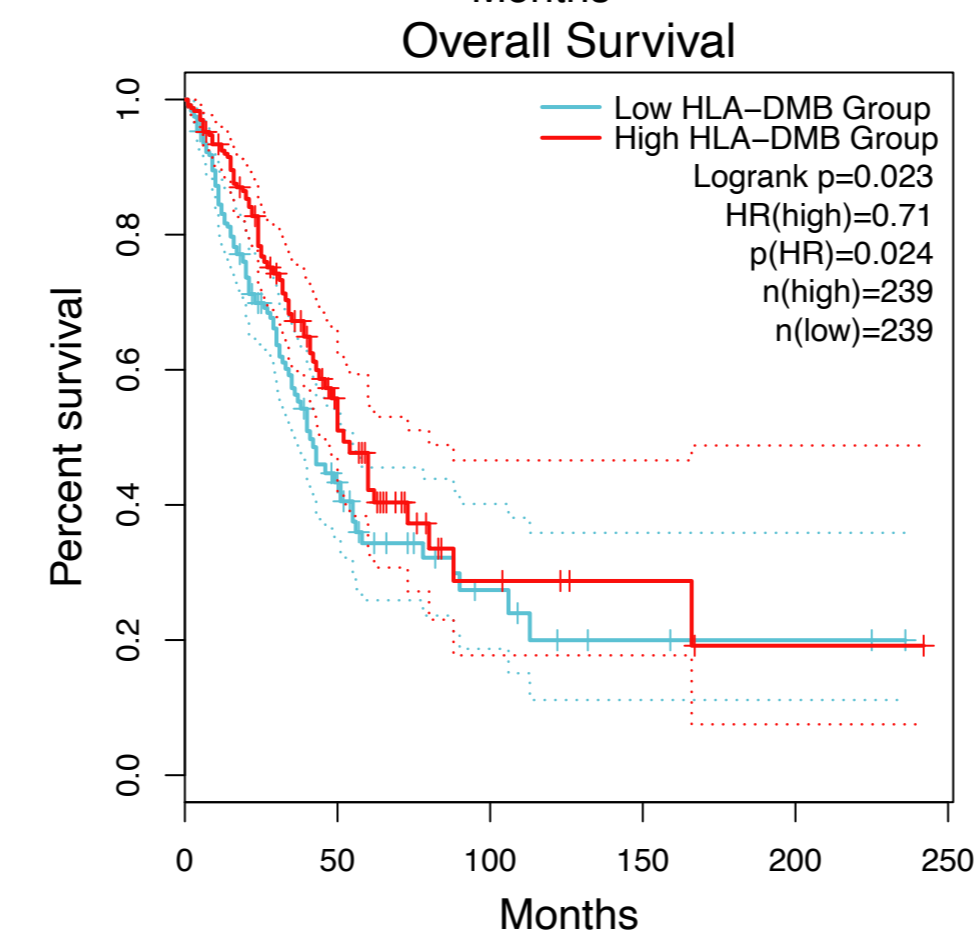

Supplement: 262_2021_3066_MOESM2_ESM.pdf [file 262_2021_3066_MOESM2_ESM.pdf]
